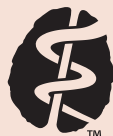

## APA Publishing

### Publisher

John McDuffie  
*Editorial Director, Journals*  
Michael D. Roy  
*Managing Editor, Journals*  
Demarie S. Jackson  
*Production Manager, Journals*  
Wendy Lieberman Taylor  
*Editorial Manager, Focus*  
Peyton D. Fultz

*Focus* (ISSN 1541-4094) is published quarterly by the American Psychiatric Association, 800 Maine Ave. S.W., Suite 900, Washington, D.C. 20024. Printed in U.S.A. Periodicals postage paid at Washington, D.C., and additional mailing offices. POSTMASTER: Send all address changes to *Focus*, Circulation Department, American Psychiatric Association Publishing, 800 Maine Ave. S.W., Suite 900, Washington, D.C. 20024.

## Subscriptions

U.S. APA member \$446, U.S. non-member \$695. For additional subscription options, including international and student rates, contact Customer Service at (202) 559-3900 or (800) 368-5777.

## Officers of the Association

Vivian Pender, M.D., M.P.H., *President*  
Rebecca W. Brendel, M.D., J.D.,  
*President-Elect*  
Saul Levin, M.D., M.P.A., *CEO and Medical Director*

## Editorial Offices

Telephone: (202) 559-3719  
Email: [focus@psych.org](mailto:focus@psych.org)  
Journal Web site: [focus.psychiatryonline.org](http://focus.psychiatryonline.org)

## Change of Address and Assistance With Subscriptions

Contact Customer Service at (202) 559-3900 or (800) 368-5777 or e-mail [appi@psych.org](mailto:appi@psych.org).

## CME

Email: [focus@psych.org](mailto:focus@psych.org)

## Online Access

Call (800) 368-5777 or e-mail [appi@psych.org](mailto:appi@psych.org) for assistance with online access to *Focus* and CME activities.

## APA Learning Center

[education.psychiatry.org](http://education.psychiatry.org)

Copyright © 2022, American Psychiatric Association

## Editor

Mark Hyman Rapaport, M.D.  
*Salt Lake City, Utah*

## Applied Armamentarium

Boadie Dunlop, M.D.  
*Atlanta, Georgia*

## Communication Commentary

Dorothy E. Stubbe, M.D.  
*New Haven, Connecticut*

## Ethics Commentary

James L. Knoll IV, M.D.  
*Syracuse, New York*  
Jarrod A. Marks, M.D.  
*Syracuse, New York*

## Patient Management Exercise

Ian A. Cook, M.D.  
*Los Angeles, California*

## Senior Advisory Board

Carol A. Bernstein, M.D.  
*New York, New York*  
Kathleen T. Brady, M.D., Ph.D.  
*Charleston, South Carolina*  
Peter F. Buckley, M.D.  
*Memphis, Tennessee*  
Glen O. Gabbard, M.D.  
*Houston, Texas*  
Ira M. Lesser, M.D.  
*Torrance, California*  
Charles F. Reynolds III, M.D.  
*Pittsburgh, Pennsylvania*  
Joel Yager, M.D.  
*Denver, Colorado*

## Editorial Board

Richard Balon, M.D.  
*Rochester Hills, Michigan*  
Joseph A. Cheong, M.D.  
*Nashville, Tennessee*  
Asmara T. Hoo-Cardiel, D.O.  
*Lansing, Michigan*  
Paresh Atu Jaini, D.O.  
*Dallas, Texas*  
Raymond Lam, M.D., F.R.C.P.C.  
*Vancouver, Canada*  
Sherrell T. Lam, MD, F.A.C.P.  
*Bethesda, Maryland*

Avram H. Mack, M.D.  
*Philadelphia, Pennsylvania*  
Vishal Madaan, M.D., M.B.B.S.  
*Charlottesville, Virginia*  
David Mischoulon, M.D., Ph.D.  
*Boston, Massachusetts*  
Francisco A. Moreno, M.D.  
*Tucson, Arizona*  
Philip R. Muskin, M.D.  
*New York, New York*  
Michele T. Pato, M.D., M.P.H.  
*Brooklyn, New York*  
Jeffrey Rakofsky, M.D.  
*Atlanta, Georgia*  
Victor I. Reus, M.D.  
*San Francisco, California*  
James W. Thompson, M.D., M.P.H.  
*Palm Beach, Florida*  
Marcia L. Verduin, M.D.  
*Orlando, Florida*  
Sidney Zisook, M.D.  
*San Diego, California*

## Focus Self-Assessment Editorial Board

Rashi Aggarwal, M.D.  
*Newark, New Jersey*  
Nicole Cotton, M.D.  
*Atlanta, Georgia*  
Vikas Gupta, M.D., M.P.H.  
*Greenville, North Carolina*  
Venkata Kolli, M.B.B.S.  
*Columbus, Nebraska*  
John Luo, M.D.  
*Orange, California*  
Jeffrey J. Rakofsky, M.D.  
*Atlanta, Georgia*  
Lorena Reyna, M.D.  
*Alton, Texas*  
Yi-lang Tang, M.D., Ph.D.  
*Decatur, Georgia*  
John Teshima, M.D., M.Ed.  
*Toronto, Canada*

## Editor Emerita

Deborah J. Hales, M.D.  
*Washington, D.C.*
