SPRING 2022 | VOLUME 20 | NUMBER 2

# Focus

The Journal of Lifelong Learning in Psychiatry

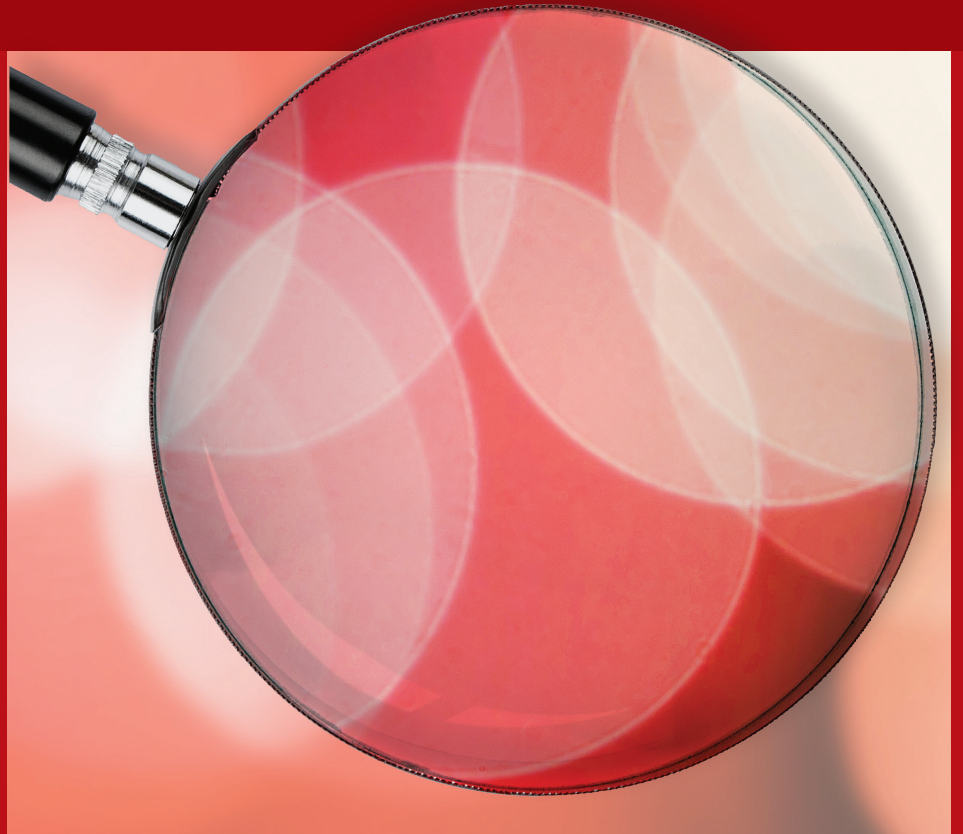

## Tools to Address Children's Mental Health

Guest Editors: Amy M. Yule, M.D., and Brian P. Kurtz, M.D.

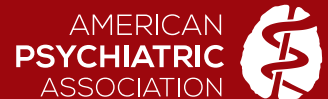

[focus.psychiatryonline.org](http://focus.psychiatryonline.org)
