SPRING 2022 | VOLUME 20 | NUMBER 2

# Focus

The Journal of Lifelong Learning in Psychiatry

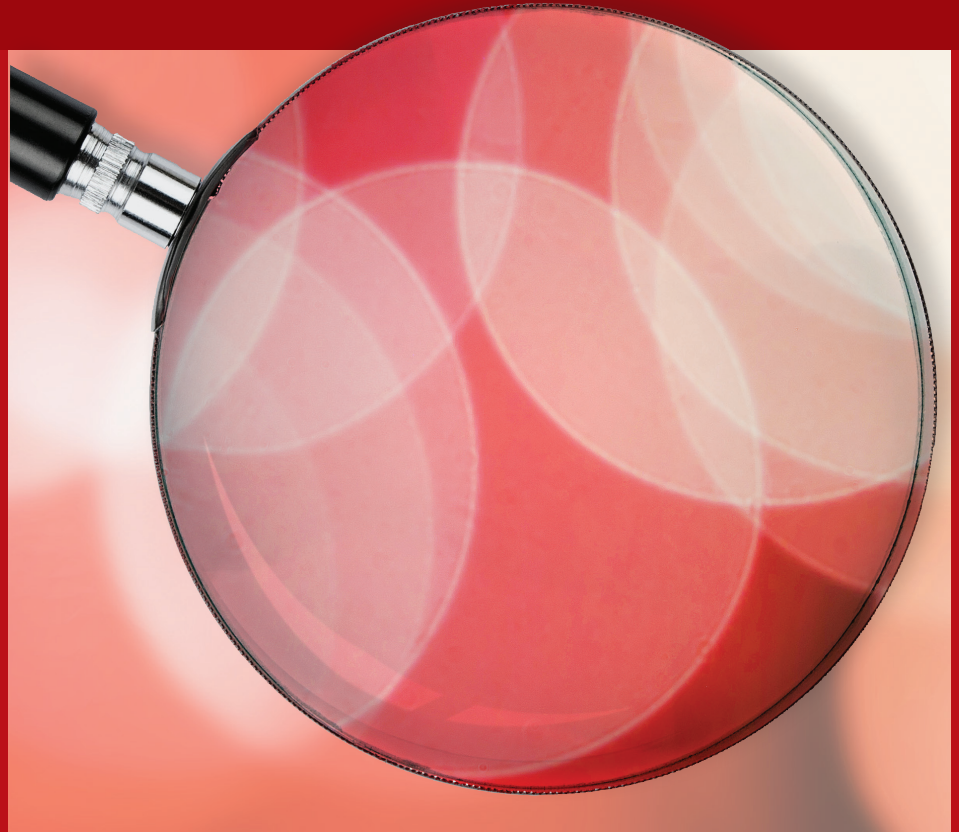

## Tools to Address Children's Mental Health

Guest Editors: Amy M. Yule, M.D., and Brian P. Kurtz, M.D.

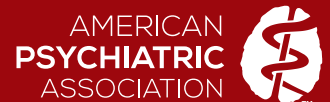

[focus.psychiatryonline.org](http://focus.psychiatryonline.org)

CHILDREN'S MENTAL HEALTH

SPRING 2022 | VOLUME 20 | NUMBER 2

FOCUS

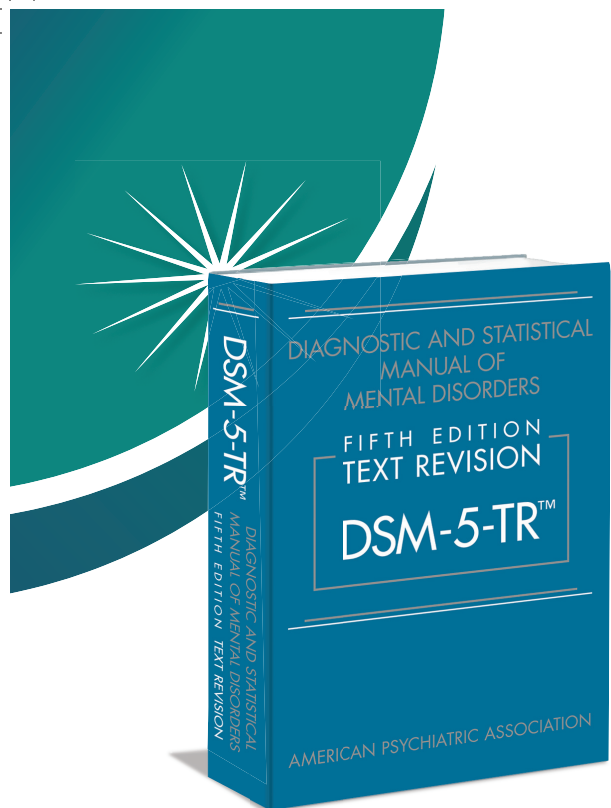

**New!**

# Diagnostic and Statistical Manual of Mental Disorders, Fifth Edition, Text Revision (DSM-5-TR™)

American Psychiatric Association

The *Diagnostic and Statistical Manual of Mental Disorders*, Fifth Edition, Text Revision (DSM-5-TR), is the most comprehensive, current, and critical resource for clinical practice available to today's mental health clinicians and researchers. DSM-5-TR includes the fully revised text and references, updated diagnostic criteria and ICD-10-CM codes since DSM-5 was published in 2013. It features a new disorder, Prolonged Grief Disorder, as well as codes for suicidal behavior available to all clinicians of any discipline without the requirement of any other diagnosis.

With contributions from over 200 subject matter experts, this updated volume boasts the most current text updates based on the scientific literature. Now in four-color and with the ability to authenticate each printed copy, DSM-5-TR provides a cohesive, updated presentation

of criteria, diagnostic codes, and text. This latest volume offers a common language for clinicians involved in the diagnosis and study of mental disorders and facilitates an objective assessment of symptom presentations across a variety of clinical settings—inpatient, outpatient, partial hospital, consultation-liaison, clinical, private practice, and primary care.

## Stay current with these important updates to DSM-5-TR™:

- Fully revised text for each disorder with updated sections on associated features, prevalence, development and course, risk and prognostic factors, culture, diagnostic markers, suicide, differential diagnosis, and more.
- Addition of Prolonged Grief Disorder (PGD) to Section II—a new disorder for diagnosis
- Over 70 modified criteria sets with helpful clarifications since publication of DSM-5
- Fully updated Introduction and Use of the Manual to guide usage and provide context for important terminology
- Considerations of the impact of racism and discrimination on mental disorders integrated into the text
- New codes to flag and monitor suicidal behavior, available to all clinicians of any discipline and without the requirement of any other diagnosis
- Fully updated ICD-10-CM codes implemented since 2013, including over 50 coding updates new to DSM-5-TR for substance intoxication and withdrawal and other disorders
- Updated and redesigned Diagnostic Classification

This manual is a valuable resource for other physicians and health professionals, including psychologists, counselors, nurses, and occupational and rehabilitation therapists, as well as social workers and forensic and legal specialists. DSM-5-TR™ is the most definitive resource for the diagnosis and classification of mental disorders.

2022 • 1,142 pages • ISBN 978-0-89042-575-6 • Hardcover • \$220.00 • Item #2575

2022 • 1,142 pages • ISBN 978-0-89042-576-3 • Paperback • \$170.00 • Item #2576

2022 • 1,142 pages • ISBN 978-0-89042-577-0 • eBook • \$136.00 • Item #2577

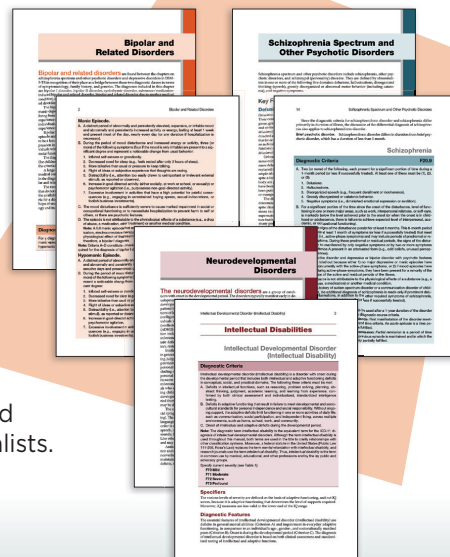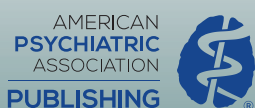

**20% Discount for American Psychiatric Association Members**  
**25% Discount for APA Resident-Fellow Members**

► ORDER @ [www.appi.org](http://www.appi.org) | Email: [appi@psych.org](mailto:appi@psych.org) | Toll Free: 1-800-368-5777

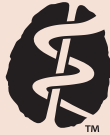

## APA Publishing

### Publisher

John McDuffie

*Editorial Director, Journals*

Michael D. Roy

*Managing Editor, Journals*

Demarie S. Jackson

*Production Manager, Journals*

Wendy Lieberman Taylor

*Editorial Manager, Focus*

Peyton D. Fultz

*Focus* (ISSN 1541-4094) is published quarterly by the American Psychiatric Association, 800 Maine Ave. S.W., Suite 900, Washington, D.C. 20024. Printed in U.S.A. Periodicals postage paid at Washington, D.C., and additional mailing offices. POSTMASTER: Send all address changes to *Focus*, Circulation Department, American Psychiatric Association Publishing, 800 Maine Ave. S.W., Suite 900, Washington, D.C. 20024.

## Subscriptions

U.S. APA member \$446, U.S. non-member \$695. For additional subscription options, including international and student rates, contact Customer Service at (202) 559-3900 or (800) 368-5777.

## Officers of the Association

Vivian Pender, M.D., M.P.H., *President*

Rebecca W. Brendel, M.D., J.D.,

*President-Elect*

Saul Levin, M.D., M.P.A., *CEO and Medical*

*Director*

## Editorial Offices

Telephone: (202) 559-3719

Email: [focus@psych.org](mailto:focus@psych.org)

Journal Web site: [focus.psychiatryonline.org](http://focus.psychiatryonline.org)

## Change of Address and Assistance With Subscriptions

Contact Customer Service at (202) 559-3900 or (800) 368-5777 or e-mail [appi@psych.org](mailto:appi@psych.org).

## CME

Email: [focus@psych.org](mailto:focus@psych.org)

## Online Access

Call (800) 368-5777 or e-mail [appi@psych.org](mailto:appi@psych.org) for assistance with online access to *Focus* and CME activities.

## APA Learning Center

[education.psychiatry.org](http://education.psychiatry.org)

Copyright © 2022, American Psychiatric Association

## Editor

Mark Hyman Rapaport, M.D.

*Salt Lake City, Utah*

## Applied Armamentarium

Boadie Dunlop, M.D.

*Atlanta, Georgia*

## Communication Commentary

Dorothy E. Stubbe, M.D.

*New Haven, Connecticut*

## Ethics Commentary

James L. Knoll IV, M.D.

*Syracuse, New York*

Jarrod A. Marks, M.D.

*Syracuse, New York*

## Patient Management Exercise

Ian A. Cook, M.D.

*Los Angeles, California*

## Senior Advisory Board

Carol A. Bernstein, M.D.

*New York, New York*

Kathleen T. Brady, M.D., Ph.D.

*Charleston, South Carolina*

Peter F. Buckley, M.D.

*Memphis, Tennessee*

Glen O. Gabbard, M.D.

*Houston, Texas*

Ira M. Lesser, M.D.

*Torrance, California*

Charles F. Reynolds III, M.D.

*Pittsburgh, Pennsylvania*

Joel Yager, M.D.

*Denver, Colorado*

## Editorial Board

Richard Balon, M.D.

*Rochester Hills, Michigan*

Joseph A. Cheong, M.D.

*Nashville, Tennessee*

Asmara T. Hoo-Cardiel, D.O.

*Lansing, Michigan*

Pareesh Atu Jaini, D.O.

*Dallas, Texas*

Raymond Lam, M.D., F.R.C.P.C.

*Vancouver, Canada*

Sherrell T. Lam, MD, F.A.C.P.

*Bethesda, Maryland*

Avram H. Mack, M.D.

*Philadelphia, Pennsylvania*

Vishal Madaan, M.D., M.B.B.S.

*Charlottesville, Virginia*

David Mischoulon, M.D., Ph.D.

*Boston, Massachusetts*

Francisco A. Moreno, M.D.

*Tucson, Arizona*

Philip R. Muskin, M.D.

*New York, New York*

Michele T. Pato, M.D., M.P.H.

*Brooklyn, New York*

Jeffrey Rakofsky, M.D.

*Atlanta, Georgia*

Victor I. Reus, M.D.

*San Francisco, California*

James W. Thompson, M.D., M.P.H.

*Palm Beach, Florida*

Marcia L. Verduin, M.D.

*Orlando, Florida*

Sidney Zisook, M.D.

*San Diego, California*

## Focus Self-Assessment

### Editorial Board

Rashi Aggarwal, M.D.

*Newark, New Jersey*

Nicole Cotton, M.D.

*Atlanta, Georgia*

Vikas Gupta, M.D., M.P.H.

*Greenville, North Carolina*

Venkata Kolli, M.B.B.S.

*Columbus, Nebraska*

John Luo, M.D.

*Orange, California*

Jeffrey J. Rakofsky, M.D.

*Atlanta, Georgia*

Lorena Reyna, M.D.

*Alton, Texas*

Yi-lang Tang, M.D., Ph.D.

*Decatur, Georgia*

John Teshima, M.D., M.Ed.

*Toronto, Canada*

## Editor Emerita

Deborah J. Hales, M.D.

*Washington, D.C.*

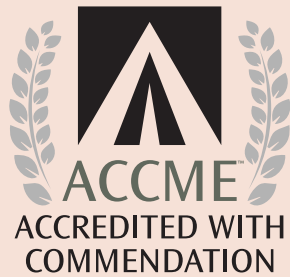

#### EDUCATIONAL OBJECTIVES

*Focus*, the APA clinical review and continuing medical education (CME) journal, is designed as a personal study resource to help practicing psychiatrists keep abreast of significant advances in the field, with particular attention to clinical practice.

With each issue, participants review current knowledge, recognize gaps in learning, and increase their understanding of an important topic in the field of psychiatry.

Participants also can prepare for an annual self-assessment designed to aid the physician in addressing areas where more study is needed to enhance management of patients.

#### TO EARN CME CREDIT

Each issue, prepared by distinguished faculty who are recognized leaders in their fields, incorporates a CME component. To earn CME credit for *Focus*, subscribers should read through the material presented in each issue. After reading the material, complete the CME Quiz and course evaluation online and earn credit with a passing score of 60%.

#### ACCREDITATION AND DESIGNATION

The American Psychiatric Association is accredited by the Accreditation Council for Continuing Medical Education (ACCME) to provide CME for physicians.

The APA designates this journal-based CME activity for a maximum of 5 *AMA PRA Category 1 Credits*<sup>™</sup>. Physicians should claim only the credit commensurate with the extent of their participation in the activity.

Neither the American Psychiatric Association nor American Psychiatric Association Publishing holds itself responsible for statements made in its publications by contributors. Unless so stated, material in *Focus* does not reflect the endorsement, official attitude, or position of the American Psychiatric Association, American Psychiatric Association Publishing, or the journal's Editorial Board.

Material published in the journals of the American Psychiatric Association is protected by copyright and all rights are reserved. Material may not be reproduced in any form or by any means without written permission from the copyright owner. For permission to reproduce material from American Psychiatric Association journals, please visit [www.appi.org/CustomerService/Pages/Permissions.aspx](http://www.appi.org/CustomerService/Pages/Permissions.aspx) for more information. Permission can also be secured through the Copyright Clearance Center ([www.copyright.com](http://www.copyright.com)). For bulk reprints, please contact [permissions@psych.org](mailto:permissions@psych.org).

This consent does not extend to other kinds of copying, such as copying for general distribution, for advertising or promotional purposes, for creating new collective works, or for resale. Permission need not be obtained for photocopying isolated articles for nonprofit classroom or library reserve use; all fees associated with such permission are waived.

# Focus

The Journal of Lifelong Learning in Psychiatry

"Lifelong Learning in Psychiatry" is an evolving series of educational initiatives developed by the American Psychiatric Association to meet the changing needs of psychiatrists for the 21st century.

*Focus* offers clinical reviews and original research for practicing psychiatrists to keep abreast of significant advances in the field. Developed as part of APA's "Lifelong Learning in Psychiatry" series—educational initiatives to meet the changing needs of psychiatrists for the 21st century—*Focus* has as its goal the dissemination of up-to-date information while facilitating lifelong study skills and critical self-assessment for improving patient care and preparation for maintenance of certification. Each issue is designed as a personal study resource with particular attention to clinical practice and offers opportunities to earn *AMA PRA Category 1 Credit*<sup>™</sup>.

#### The American Board of Psychiatry and Neurology

The American Board of Psychiatry and Neurology has reviewed *Focus: The Journal of Lifelong Learning in Psychiatry* and the *Focus Self-Assessment Examination* and has approved this program as part of a comprehensive lifelong learning and self-assessment program, which is mandated by the American Board of Medical Specialties as a necessary component of maintenance of certification.

#### Royal College of Physicians and Surgeons of Canada

The *Focus Self-Assessment* is an Accredited Self-Assessment Program (Section 3) as defined by the Maintenance of Certification Program of the Royal College of Physicians and Surgeons of Canada, and was approved by the Canadian Psychiatric Association. You may claim a maximum of 24 hours (credits are automatically calculated).

**Editor and Advisor Program Planner Disclosure Listing for *Focus* Editor in Chief:**

Mark H. Rapaport, M.D., has no relevant financial relationships to disclose.

**Editor and Advisor Program Planner Disclosure Listing for *Focus* and *Focus* Self-Assessment Editors, Associate Editors, Editorial Boards, and staff:**

Ian Cook, M.D., active biomedical device patents assigned to the University of California; CEO and director of HeartCloud Inc. and BrainCloud Corporation; CEO and board chair of NeuroSigma Inc. (on leave since 2016 as chief medical officer); equity interest in HeartCloud Inc. and the BrainCloud Corporation; stock options in NeuroSigma Inc. Boadie Dunlop, M.D., grant/research funding from Compass Pathways, Otsuka, Aptinyx, Acadia; consultant at Myriad Neuroscience, Sage Therapeutics, Otsuka Pharmaceutical, Greenwich Biosciences. James L. Knoll IV, M.D., annual honorarium as a member of the teaching faculty for the annual AAPL forensic psychiatry board review course. Raymond Lam, M.D., consultant: Allergan, Asia-Pacific Economic Cooperation, Canadian Network for Mood and Anxiety Treatments, Janssen, Lundbeck, Myriad Neuroscience, Otsuka, Pfizer; ad hoc speaking honoraria: Canadian Network for Mood and Anxiety Treatments, Canadian Psychiatric Association, Hansoh, Lundbeck, Lundbeck Institute, Pfizer; grant/research funding from BC Leading Edge Endowment Fund, Canadian Institutes of Health Research, Canadian Network for Mood and Anxiety Treatments, Healthy Minds Canada, Janssen, Lundbeck, Michael Smith Foundation for Health Research, MITACS, Ontario Brain Institute, St. Jude Medical, University Health Network Foundation, VGH-UBCH Foundation; book royalties: Cambridge University Press, Informa Press, Oxford University Press; copyright: Lam Employment Absence and Productivity Scale (LEAPS). Vishal Madaan, M.D., grant/research funding from Allergan, Boehringer-Ingelheim, Neurocrine, Otsuka, Pfizer, Shire, Supernus. David Mischoulon, M.D., Ph.D., employed part time, MGH Clinical Trials Network and Institute (CTNI), which has received research funding from multiple pharmaceutical companies and NIMH; grant/research funding from Nordic Naturals (donated omega-3 fatty acid medication and placebo for clinical trial) and heckel medizintechnik GmbH (supplied whole body hyperthermia device for clinical trial). Francisco A. Moreno, M.D., Liva Nova: DSMB chair. Jeffrey J. Rakofsky, M.D., grant/research funding from Compass, Otsuka. Sidney Zisook, M.D., grant/research funding from COMPASS Pathways.

**Editors and Members of the Editorial Boards of *Focus* and the *Focus* Self-Assessment and staff listed below report no disclosures:**

Rashi Aggarwal, M.D., Richard Balon, M.D., Carol A. Bernstein, M.D., Kathleen T. Brady, M.D., Peter F. Buckley, M.D., Ph.D., Josepha A. Cheong, M.D., Nicole Cotton, M.D., Peyton Fultz, Glen O. Gabbard, M.D., Tristan Gorrindo, M.D., Vikas Gupta, M.D., M.P.H., Asmara T. Hoo-Cardiel, D.O., Paresh Atu Jaini, D.O. Venkata Kolli, M.B.B.S., Sherrell T. Lam, M.D., Ira M. Lesser, M.D., John Luo, M.D., Avram H. Mack, M.D., Jarrod A. Marks, M.D., Philip R. Muskin, M.D., Michele T. Pato, M.D., M.P.H., Lorena Reyna, M.D., Victor I. Reus, M.D., Charles F. Reynolds, III, M.D., Dorothy E. Stubbe, M.D., Yi-lang Tang, M.D., Ph.D., John Teshima, M.D., M.Ed., James W. Thompson, M.D., M.P.H., Marcia L. Verduin, M.D., Joel Yager, M.D.

**Improvement in Medical Practice/Performance in Practice (PIP) Clinical Modules Published in *Focus***

Contact American Psychiatric Association, Department of CME, educme@psych.org for information regarding revised end dates and updates to the MOC Part 4 PIP clinical modules. Performance in Practice modules are available to all *Focus* subscribers online in the APA Learning Center at education.psychiatry.org.

The American Board of Psychiatry and Neurology has approved the following *Focus* Performance in Practice clinical chart review tools of the American Psychiatric Association as Maintenance of Certification, Part 4, Clinical Modules.

Performance in Practice: Practice Assessment

Tool for the Care of Patients with Schizophrenia

October 2020–October 2023

Performance in Practice: Physician Practice Assessment

Tool for the Assessment and Treatment of Adults at Risk for Suicide and Suicide-Related Behaviors

March 2011–March 2023

Performance in Practice: Clinical Module for the Care of Patients with Posttraumatic Stress Disorder

September 2018–September 2023

Performance in Practice: Clinical Module for

Screening Adult Psychiatric Patients for Substance Use Disorders

September 2018–September 2024

**PIP Clinical Modules online (MOC Part 4)**

FOCUS subscribers who are also APA members: Access and complete PIP Clinical Modules online in the APA Learning Center at education.psychiatry.org using your APA member login.

Non-member subscribers: Contact educme@psych.org for access to PIP Clinical Modules online at education.psychiatry.org.

Please visit the journal's Web site at [focus.psychiatryonline.org](http://focus.psychiatryonline.org)

---

## FROM THE GUEST EDITOR

### 175 Children's Mental Health is Important for All Psychiatrists to Address

*Amy M. Yule, M.D., and Brian P. Kurtz, M.D.*

---

## FEATURES

### REVIEWS

### 176 Assessing and Responding to the Trauma of Child Maltreatment

*Brooks R. Keeshin, M.D., and Eric T. Monson, M.D., Ph.D.*

Maltreatment and resultant traumatic stress can disrupt child and youth development and lead to negative effects in adulthood. A staged, trauma-informed approach to pharmacologic treatment may be beneficial for children with a history of maltreatment-associated trauma and current traumatic stress.

### 184 Pediatric Psychopharmacology for Depressive and Anxiety Disorders

*Jeffrey R. Strawn, M.D., et al.*

SSRIs are the first-line psychopharmacologic intervention for youths with depression and anxiety, whereas SNRIs have a more limited role. Pharmacokinetic differences between youths and adults must be considered when using these medications and may produce differences in response and tolerability.

### ARTICLES

### 191 Youth Suicide

*Brian P. Kurtz, M.D., and Brian H. Levins Jr., M.D.*

As rates of suicide increase among youths, understanding key risk and protective factors, identifying youths at risk, assessing the acuity of this risk, and utilizing interventions to mitigate it are important skills for clinicians involved in youth mental health care.

### 197 Black Youth Suicide Crisis: Prevalence Rates, Review of Risk and Protective Factors, and Current Evidence-Based Practices

*Jocelyn I. Meza, Ph.D., et al.*

Black youths have rarely been included in randomized controlled trials of treatment for self-harm and suicide or in establishment of these behavior risk factors. Suicide interventions tailored for Black youths that consider the socioecological context in which these youths live are urgently needed.

### 204 Understanding Families as Essential in Psychiatric Practice

*Karen Saroca, M.S., M.D., and John Sargent, M.D.*

Family relationships can precipitate and perpetuate mental illness or can alleviate emotional and behavioral problems, leading to improved outcomes. Treatment can be enhanced by engaging patients' family members as partners whose skills can be developed to address emotional and behavioral problems.

### COMMUNICATION COMMENTARY

### 210 Confidential Communication: Addressing Challenges of Open Electronic Health Records for Youths and Families

*Dorothy E. Stubbe, M.D.*

### **ETHICS COMMENTARY**

- 215 **Who's the Boss? Ethical Dilemmas in the Treatment of Children and Adolescents**  
*Vanesa Disla de Jesus, M.D., et al.*

---

### **INFLUENTIAL PUBLICATIONS**

- 220 **Abstracts**
- 222 **Bibliography**
- 224 **A Developmental Pathway From Early Behavioral Inhibition to Young Adults' Anxiety During the COVID-19 Pandemic**  
*Selin Zeytinoglu, Ph.D., et al.*
- 232 **Suicide Among Black Children: An Integrated Model of the Interpersonal-Psychological Theory of Suicide and Intersectionality Theory for Researchers and Clinicians**  
*Ijeoma Opara, et al.*
- 241 **Efficacy of Intravenous Ketamine in Adolescent Treatment-Resistant Depression: A Randomized Midazolam-Controlled Trial**  
*Jennifer B. Dwyer, M.D., Ph.D., et al.*
- 252 **Association Between Discrimination Stress and Suicidality in Preadolescent Children**  
*Stirling T. Argabright, M.Sc., et al.*

---

### **DEPARTMENTS**

- 196 **Correction to Melaragno**
- 263 **Continuing Medical Education Quiz**

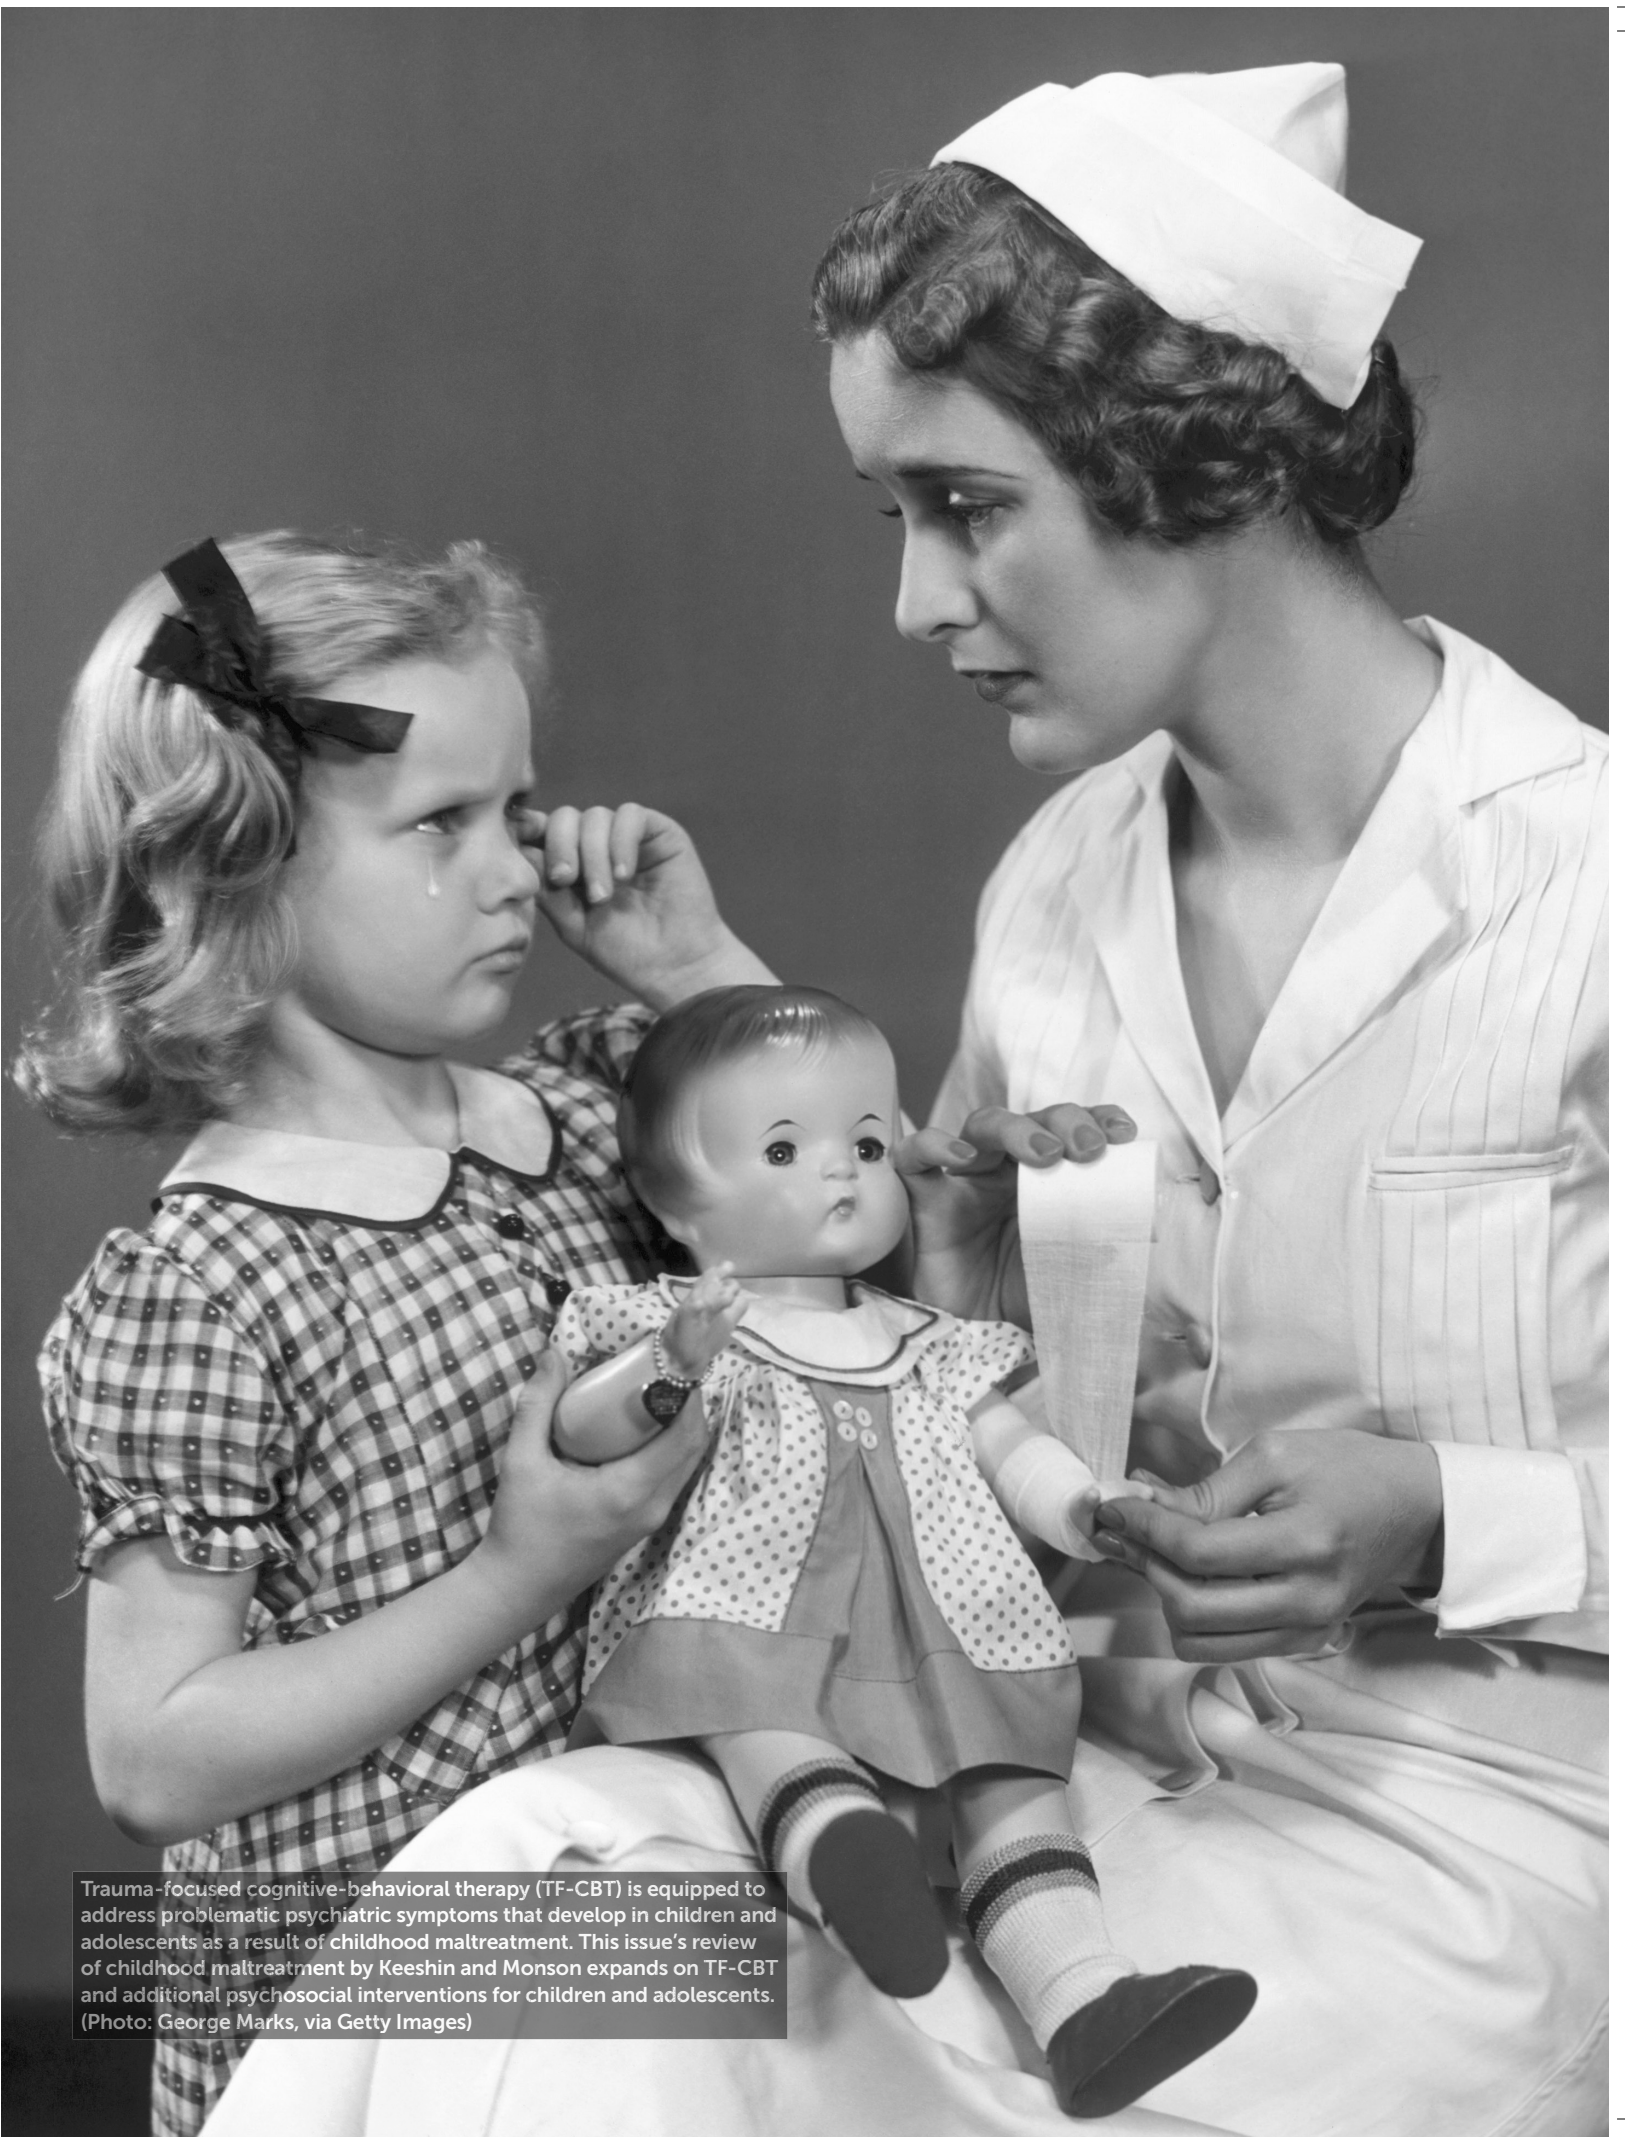

Trauma-focused cognitive-behavioral therapy (TF-CBT) is equipped to address problematic psychiatric symptoms that develop in children and adolescents as a result of childhood maltreatment. This issue's review of childhood maltreatment by Keeshin and Monson expands on TF-CBT and additional psychosocial interventions for children and adolescents. (Photo: George Marks, via Getty Images)
